# Supplementary material
Source: Elsevier journal article supplement (https://www.sciencedirect.com/science/article/pii/S0870255115002309)
Supplement: mmc1 [file S0870255115002309:mmc1.docx]

**ANEXO (FIGURAS e TABELAS SUPLEMENTARES)**

**Figura 3; Suplementar.** Rede de evidência utilizada para estimar a efetividade relativa no modelo de avaliação económica.


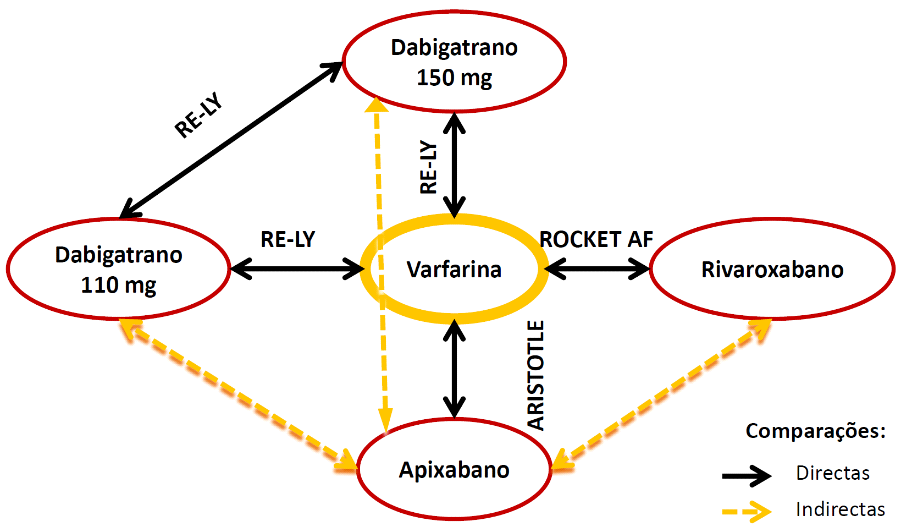


**Tabela 3; Suplementar.** Distribuição dos eventos de AVC por gravidade.

|  | **Ligeiro** | **Moderado** | **Grave** | **Fatal** |
| --- | --- | --- | --- | --- |
|  | mRS (0-2) | mRS (3-4) | mRS (5) | mRS (6) |
| **Apixabanoa** | 53% | 21% | 8% | 18% |
| **Varfarinaa** | 45% | 30% | 10% | 15% |
| **Dabigatrano (110mg)b** | 35% | 28% | 10% | 27% |
| **Dabigatrano (150mg)b** | 35% | 22% | 8% | 35% |
| **Rivaroxabanoc** | 49% | 18% | 6% | 27% |

Fonte: Lip *et al.* 201410; a. Análise secundária do estudo ARISTOTLE14; b. Assumiu-se a mesma distribuição para todos os AVCs (Connolly *et al.* 2009)50c. Assumiu-se a mesma distribuição para todos os AVCs (Patel *et al.* 2011)51.

AVC: Acidente Vascular Cerebral; mRS: escala Rankin modificada.

**Tabela 4; Suplementar.** *Hazard Ratios* (IC 95%) ajustados pelo cTTR (*center’s median* *time in therapeutic range*).

|  | **NOACs** | | | | **Varfarina** | | | |
| --- | --- | --- | --- | --- | --- | --- | --- | --- |
| **Intervalo cTTR*** | **AVC** | **HIC** | **Outras HM** | **HCR(NM)** | **AVC** | **HIC** | **Outras HM** | **HCR(NM)** |
| **cTTR < 52,38%** | 0,92  (0,58; 1,47) | 0,58  (0,22; 1,51) | 0,72  (0,44; 1,19) | 0,71  (0,46; 1,1) | 1,54  (1,02; 2,33) | 1,05  (0,62; 1,79) | 0,84  (0,57; 1,25) | 0,99  (0,71; 1,37) |
| **52,38% ≤ cTTR < 66,02%**** | 1,00 | 1,00 | 1,00 | 1,00 | 1,00 | 1,00 | 1,00 | 1,00 |
| **66,02% ≤ cTTR < 76,51%** | 0,69  (0,48; 0,99) | 0,69  (0,38; 1,26) | 1,69  (1,28; 2,23) | 1,25  (0,96; 1,61) | 0,84  (0,59; 1,19) | 0,68  (0,45; 1,03) | 1,13  (0,88; 1,44) | 1,26  (1,01; 1,56) |
| **cTTR ≥ 76,51%** | 0,56  (0,31; 1,01) | 0,36  (0,11; 1,19) | 1,77  (1,22; 2,55) | 1,70  (1,23; 2,35) | 0,72  (0,41; 1,25) | 0,78  (0,42; 1,42) | 1,37  (0,98; 1,9) | 1,27  (0,94; 1,71) |

Fonte: Análise secundária dos dados do ensaio ARISTOTLE14.

*cTTR (*center’s median time in therapeutic range*) - mediana do tempo no alvo terapêutico (INR: 2 a 3) conforme resultados obtidos nos vários centros que participaram no ensaio ARISTOTLE.

** Caso base.

AVC: Acidente Vascular Cerebral; HIC: Hemorragia Intracraniana; HCR(NM): Hemorragias Clinicamente Relevantes (Não-Major); HM: Hemorragia Major.

**Tabela 5; Suplementar.** Distribuição dos doentes por proporção de tempo no alvo terapêutico.

| **Tempo com INR no Intervalo Terapêutico, %** | **Distribuição dos Doentes na amostra portuguesa, %** | **Distribuição dos doentes na amostra do ensaio, %** |
| --- | --- | --- |
| **cTTR < 52,38%** | 55,5% | 25% |
| **52,38% ≤ cTTR < 66,02%** | 24,5% | 25% |
| **66,02% ≤ cTTR < 76,51%** | 11,1% | 25% |
| **cTTR ≥ 76,51%** | 8,8% | 25% |
| **Total** | **100%** | **100%** |

Fonte: Base de dados CHLC e HFF.

CHLC: Centro Hospitalar Lisboa Central, EPE; cTTR: *center’s median time in therapeutic range*; HFF: Hospital Fernando da Fonseca, EPE; INR: *International Normalized Ratio*.

**Tabela 6; Suplementar.** *Hazard Ratios* para descontinuação de tratamento por causas não devidas aos eventos vasculares.

|  | **HR (IC 95%)** |
| --- | --- |
| **Apixabano** | 1 |
| **Varfarinaa** | 1,080  (1,02; 1,15) |
| **Dabigatrano (110mg)b** | 1,452  (1,31; 1,61) |
| **Dabigatrano (150mg)b** | 1,505  (1,36; 1,67) |
| **Rivaroxabanob** | 1,184  (1,08; 1,29) |

Fonte: a. Análise secundária do estudo ARISTOTLE14; b. Assume-se o mesmo HR que o observado na descontinuação por todas as causas, uma vez que os estudos RE-LY e ROCKET AF não reportam informação desagregada para descontinuação por eventos vasculares e por outras causas. Os HR são maiores que 1, uma vez que a taxa de descontinuação global do apixabano foi inferior à reportada com varfarina, ao contrário do verificado nos outros NOACs.

HR: *Hazard ratio* (estimados por comparação indireta; *pairwise)*; IC: Intervalo de Confiança.

**Tabela 7; Suplementar** Taxas de eventos por 100 pessoas/ano quando o doente se encontra em segunda linha terapêutica (ácido acetilsalicílico).

| Evento | Ácido acetilsalicílico 2º Linha |
| --- | --- |
| AVC | 3,45 |
| ES | 0,32 |
| Hemorragia intracranianaa | 0,89 |
| Outras hemorragias major | 2,94 |
| Hemorragias clinicamente relevantes (não-major) | 1,10 |
| EAM | 0,44 |
| Outras Hospitalizações CV | 13,57 |

Fonte: Análise secundária do estudo AVERROES52

a A hemorragia intracraniana inclui o AVC hemorrágico e outros tipos de hemorragias intracranianas. A proporção de AVC hemorrágico para Ácido acetilsalicílico em segunda linha foi de 55%

AVC: Acidente Vascular Cerebral; EAM: Enfarte agudo do Miocárdio; ES: Embolismo Sistémico.

**Tabela 9; Suplementar.** Fatores de ajustamento do Risco (*Hazard Ratios*) de Mortalidade.

| **Evento** | **HR (95% IC)** |
| --- | --- |
| **FA não-valvular** | 1,34 (1,20; 1,53) |
| **AVC (ambos os tipos)** | |
| Ligeiro | 3,18 (1,82; 4,92) |
| Moderado | 5,84 (4,08; 7,60) |
| Grave | 15,75 (13,99; 17,51) |
| **ES** | 1,34 (1,20; 1,53) |
| **EAM** |  |
| Homens | 2,56 (3,44; 5,03) |
| Mulheres | 4,16 (2,27; 2,88) |

Fonte: Brønnum-Hansen *et al.* (2001)53, Henriksson *et al.* (2010)54, Huybrechts *et al.* (2008)55.

AVC: Acidente Vascular Cerebral; EAM: Enfarte Agudo do Miocárdio; ES: Embolismo Sistémico; FA: Fibrilhação Auricular; HR: *Hazard Ratio*; IC: Intervalo de confiança.

Tabela 14; Suplementar. Resumo dos resultados das análises de sensibilidade.

| **Referência** | **Análise** | **Varfarina** | **Dabigatrano** | **Rivaroxabano** |
| --- | --- | --- | --- | --- |
| **no texto** | **ICUR (€/QALY)** | **ICUR (€/QALY)** | **Benefício líquido* (€)** |
| 1 | Utilização dos HR estimados por Mitchell *et al.* 201320 | 5.590,52 | 10.599,93 | 737,27 |
| 2 | Níveis de adequabilidade do controlo de hipocoagulação como verificado nos ensaios | 6.740,70 | 8.229,74 | 874,30 |
| 3 | Duração da fase aguda dos episódios de internamento de seis semanas | 5.531,95 | 9.160,65 | 730,37 |
| 4 | Custos de AVC diferentes dependentes do seu nível de gravidade (a partir das estimativas inglesas) | 5.559,85 | 8.449,95 | 723,18 |
| 5 | Distribuição eventos AVC por gravidade similar para todos os comparadores** | 5.601,85 | 12.016,36 | 564,64 |
| 6 | Taxa descontinuação do tratamento por outras causas similar desde começo ensaio para todos os comparadores** | 5.313,84 | 5.161,81 | 679,93 |
| 7 | Taxas de mortalidade após duração do ensaio, iguais às da população em geral | 5.234,19 | 8.444,37 | 767,13 |
| 8 | Utilidades como em Sullivan (2006) | 5.125,67 | 7.926,91 | 746,79 |
| 9 | Taxa de atualização de custos e utilidades: 3% e 0% | 5.285,03 e 4.908,75 | 8.839,03 e 8.313,47 | 720,59 e 1.096,69 |

*considerando uma disponibilidade a pagar de 20.000€/QALY.

** Considerados os resultados obtidos no braço apixabano do estudo ARISTOTLE.

**REFERÊNCIAS**

1 Bonhorst D, Mendes M, Adragão P *et al.* Prevalence of atrial fibrillation in the Portuguese population aged 40 and over: the FAMA study. Rev Port Cardiol. 2010; 29:331-50.

2 Lip GY, Golding DJ, Nazir M *et al*. A survey of atrial fibrillation in general practice: the West Birmingham Atrial Fibrillation Project. Br J Gen Pract 1997; 47:285–289.

3 Naccarelli GV, Varker H, Lin J *et al*. Increasing prevalence of atrial fibrillation and flutter in the United States. Am J Cardiol 2009; 104:1534–1539.

4 Hart RG, Pearce LA, Aguilar MI. Meta-analysis: antithrombotic therapy to prevent stroke in patients who have nonvalvular atrial fibrillation. Ann Intern Med. 2007; 146:857-67.

5 Caldeira D, Barra M, David C *et al*. The prevalence of oral anticoagulation in patients with atrial fibrillation in Portugal: Systematic review and meta-analysis of observational studies. Rev Port Cardiol. 2014; 33:555-60.

6 Dogliotti A, Paolasso E, Giugliano RP. Current and new oral antithrombotics in non-valvular atrial fibrillation: a network meta-analysis of 79 808 patients. Heart. 2014; 100:396-405.

7 Caldeira D, Barra M, Pinto FJ *et al*. Intracranial hemorrhage risk with the new oral anticoagulants: a systematic review and meta-analysis. J Neurol. 2015; 262(3):516-22.

8 Silva Miguel L, Rocha E, Ferreira J. Economic evaluation of dabigatran for stroke prevention in patients with non-valvular atrial fibrillation. Rev Port Cardiol. 2013; 32:557-65.

9 Morais J, Aguiar C, McLeod E *et al*. Cost-effectiveness of rivaroxaban for stroke prevention in atrial fibrillation in the Portuguese setting. Rev Port Cardiol. 2014; 33:535-44.

10 Lip GY, Kongnakorn T, Phatak H *et al*. Cost-effectiveness of apixaban versus other new oral anticoagulants for stroke prevention in atrial fibrillation. Clin Ther. 2014; 36:192-210.

11 Gage BF, van Walraven C, Pearce L *et al*. Selecting patients with atrial fibrillation for anticoagulation: stroke risk stratification in patients taking aspirin. Circulation. 2004; 110:2287-92.

12 Bonita R, Beaglehole R. Modification of Rankin Scale: Recovery of motor function after stroke. Stroke 1988; 19:1497-1500.

3 Silva EA, Pinto CG, Sampaio C *et al.* Orientações Metodológicas para Estudos de Avaliação Económica de Medicamentos do Infarmed. Disponível em: <http://www.infarmed.pt/portal/page/portal/INFARMED/MEDICAMENTOS_USO_HUMANO/AVALIACAO> (Acedido em 19 de dezembro de 2014).

14 Granger CB, Alexander JH, McMurray JJ *et al.* Aristotle Committees and Investigators. Apixaban versus warfarin in patients with atrial fibrillation. N EnglJMed. 2011; 365:981–992.

5 Baker WL, Phung OJ. Systematic review and adjusted indirect comparison meta-analysis of oral anticoagulants in atrial fibrillation. Circ Cardiovasc Qual Outcomes. 2012; 5:711-9.

6 Harenberg J, Marx S, Diener HC *et al*. Comparison of efficacy and safety of dabigatran, rivaroxaban and apixaban in patients with atrial fibrillation using network meta-analysis. Int Angiol. 2012; 31:330-9.

7 Testa L, Agnifili M, Latini RA *et al*. Adjusted indirect comparison of new oral anticoagulants for stroke prevention in atrial fibrillation. QJM. 2012; 105:949-57.

8 Lip GY, Larsen TB, Skjøth F *et al*. Indirect comparisons of new oral anticoagulant drugs for efficacy and safety when used for stroke prevention in atrial fibrillation. J Am Coll Cardiol. 2012; 60:738-46.

9 Biondi-Zoccai G, Malavasi V, D'Ascenzo F *et al*. Comparative effectiveness of novel oral anticoagulants for atrial fibrillation: evidence from pair-wise and warfarin-controlled network meta-analyses. HSR Proc Intensive Care Cardiovasc Anesth. 2013; 5:40-54.

20 Mitchell SA, Simon TA, Raza S *et al*. The efficacy and safety of oral anticoagulants in warfarin-suitable patients with nonvalvular atrial fibrillation: systematic review and meta-analysis. Clin Appl Thromb Hemost. 2013; 19:619-31.

21 Cameron C, Coyle D, Richter T *et al*. Systematic review and network meta-analysis comparing antithrombotic agents for the prevention of stroke and major bleeding in patients with atrial fibrillation. BMJ Open. 2014; 4:e004301.

22 Assiri A, Al-Majzoub O, Kanaan AO *et al*. Mixed treatment comparison meta-analysis of aspirin, warfarin, and new anticoagulants for stroke prevention in patients with nonvalvular atrial fibrillation. Clin Ther. 2013; 35:967-984.e2

23 Bucher HC, Guyatt GH, Griffith LE *et al*. The results of direct and indirect treatment comparisons in meta-analysis of randomized controlled trials. J Clin Epidemiol. 1997; 50:683-91

24 Portaria n°20/2014 de 29 de janeiro. Disponível em: <http://www.acss.min-saude.pt/Portals/0/Portaria_20_2014.pdf> (Acedido em 19 de dezembro de 2014)

25 Administração Central do Sistema de Saúde, I.P. (base de dados dos Grupos de Diagnóstico Homogéneos [GDH], 2013)

26 Base de dados de medicamentos do Infarmed (Infomed). Disponível em: <http://www.infarmed.pt/infomed/pesquisa.php> (Acedido em 2 de janeiro de 2015).

27 Scarborough P, Bhatnagar P, Coronary Heart Disease statistics 2010 edition; British Health Foundation Health Promotion research group, Department of Public Health, University of Oxford.

28 INE. Tábua Completa de Mortalidade Completa para Portugal. 2014:2011-13. Disponível em: <http://www.ine.pt/xportal/xmain?xpid=INE&xpgid=ine_destaques&DESTAQUESdest_boui=211349189&DESTAQUESmodo=2> (Acedido em 19 de dezembro de 2014)

29 Friberg L, Hammar N, Pettersson H *et al*. Increased mortality in paroxysmal atrial fibrillation: report from the Stockholm Cohort-Study of Atrial Fibrillation (SCAF). European heart journal. 2007; 28:2346-2353.

30 Sullivan PW, Slejko JF, Sculpher MJ, Ghushchyan V. Catalogue of EQ-5D scores for the United Kingdom. Med Decis Making. 2011; 31:800-4.

31 Gage BF, Cardinalli AB, Owens DK. The Effect of stroke and stroke prophylaxis with aspirin or warfarin on quality of life. Arch Intern Med. 1996; 156:1829-36.

32 Verhoef TI, Redekop WK, Hasrat F *et al*. Cost effectiveness of new oral anticoagulants for stroke prevention in patients with atrial fibrillation in two different European healthcare settings. Am J Cardiovasc Drugs. 2014; 14:451-62.

33 Wisløff T, Hagen G, Klemp M. Economic evaluation of warfarin, dabigatran, rivaroxaban, and apixaban for stroke prevention in atrial fibrillation. Pharmacoeconomics. 2014; 32:601-12

34 Zheng Y, Sorensen SV, Gonschior AK *et al*. Comparison of the Cost-effectiveness of New Oral anticoagulants for the Prevention of Stroke and Systemic Embolism in Atrial Fibrillation in a UK Setting. Clin Ther. 2014; 36:2015-2028.

35 Claxton K, Sculpher M, Drummond M. A rational framework for decision making by the National Institute For Clinical Excellence (NICE). Lancet. 2002; 360:711-5.

36 Goeree R, O'Brien BJ, Blackhouse G *et al*. Cost-effectiveness and cost-utility of long-term management strategies for heartburn. Value Health 2002; 5:312–28.

37 Briggs AH, Sculpher MJ, Claxton K. Decision Modelling for Health Economic Evaluation. New York: Oxford University Press, 2006.

38 Gouveia M, Costa J, Alarcão J *et al*. Burden of disease and cost of illness of atrial fibrillation in Portugal. Rev Port Cardiol. 2015; 34(1):1-11.

39 Alto Comissariado da Saúde. Coordenação Nacional para as Doenças Cardiovasculares. Terapêutica Antitrombótica da Fibrilhação Auricular. 2009.

40 Relatório mensal do mercado de ambulatório em Portugal do Infarmed. 2014. Disponível em: <http://www.infarmed.pt/portal/page/portal/INFARMED/MONITORIZACAO_DO_MERCADO/OBSERVATORIO/ANALISE_MENSAL_MERCADO/Relat%F3rio_Ambulat%F3rio_Set14.pdf> (Acedido em 16 de janeiro de 2015)

41 Ferreira J, Mirco A, Revisão sistemática das análises custo-efetividade dos novos anticoagulantes orais na prevenção do acidente vascular cerebral na fibrilação auricular. Rev Port Cardiol. 2015; 34:179-91.

42 Kongnakorn T, Lanitis T, Annemans L *et al.* Stroke and Systemic Embolism Prevention in Patients with Atrial Fibrillation in Belgium: Comparative Cost Effectiveness of New Oral Anticoagulants and Warfarin. Clin Drug Investig. 2014; 35:109-19.

43 Edwards S, Hamilton V, Trevor N. *et al*. NICE report: Apixaban for the prevention of stroke and systemic embolism in people with nonvalvular atrial fibrillation. 2012. Disponível em: <http://www.nice.org.uk/guidance/ta275/documents/stroke-and-systemic-embolism-prevention-nonvalvular-atrial-fibrillation-apixaban-evidence-review-group-report2> (Acedido em: 19 de janeiro de 2015)

44 Lanitis T, Cotté FE, Gaudin AF *et al.* Stroke prevention in patients with atrial fibrillation in France: comparative cost-effectiveness of new oral anticoagulants (apixaban, dabigatran, and rivaroxaban), warfarin, and aspirin. J Med Econ. 2014; 17:587-98.

45 Harrington AR, Armstrong EP, Nolan PE Jr *et al.* Cost effectiveness of apixaban, dabigatran, rivaroxaban, and warfarin for stroke prevention in atrial ﬁbrillation. Stroke. 2013; 44:1676–1681.

46 Sullivan PW, Arant TW, Ellis SL *et al*. The cost effectiveness of anticoagulation management services for patients with atrial ﬁbrillation and at high risk of stroke in the US. Pharmacoeconomics. 2006; 24:1021–1033.

47 Wallentin L, Yusuf S, Ezekowitz MD *et al.* Efﬁcacy and safety of dabigatran compared with warfarin at different levels of international formalised ratio control for stroke prevention in atrial ﬁbrillation: an analysis of the RE-LY trial. Lancet. 2010; 376(9745):975–83.

48 Janzic A, Kos M. Cost Effectiveness of Novel Oral Anticoagulants for Stroke Prevention in Atrial Fibrillation Depending on the Quality of warfarin Anticoagulation Control. Pharmacoeconomics. 2015; 33:395-408.

49 Schneeweiss S, Gagne JJ, Patrick AR *et al.* Comparative efﬁcacy and safety of new oral anticoagulants in patients with atrial ﬁbrillation. Circ Cardiovasc Qual Outcomes. 2012; 5:480–486.

50 Connolly SJ, Ezekowitz MD, Yusuf S *et al.* Dabigatran versus warfarin in patients with atrial fibrillation. N Engl J Med. 2009; 361:1139-1151.

51 Patel M, Mahaffey K, Garg J *et al.* Rivaroxaban versus warfarin in nonvalvular atrial fibrillation. N Engl J Med. 2011; 365:883-891.

52 Connolly SJ, Eikelboom J, Joyner C *et al.* AVERROES Steering Committee and Investigators. Apixaban in patients with atrial ﬁbrillation. N Engl J Med. 2011; 364:806–817.

53 Brønnum-Hansen H, Davidsen M, Thorvaldsen P *et al*. Long-Term Survival and Causes of Death After Stroke. Stroke. 2001; 32:2131-2136.

54 Henriksson K, Farahmand B, Johansson S *et al*. Survival after stroke - The impact of CHADS2 score and AF. Intl Journal of Cardiology. 2010; 141:18-23.

55 Huybrechts KF, Caro JJ, Xenakis J. The prognostic value of the modified rankin scale score for long-term survival after first-ever stroke. Cerebrovasc Dis 2008; 26:381-387.
